# Supplementary material for: RETRACTED: Optimum 3D Matrix Stiffness for Maintenance of Cancer Stem Cells Is Dependent on Tissue Origin of Cancer Cells
Source: PubMed Central journal article supplement (PMC4500566; doi:10.1371/journal.pone.0132377), 2015-07-13
Supplement: pone.0132377.s001.pdf [file pone.0132377.s001.pdf]

S1. Tables of p-values for statistically significant differences for the data with an asterisk in Fig. 1, 2, and 5

**Table A.** P-values for Fig. 1C days 6 and 9

|                          |     | day 6                 |         |                          |     | day 9                 |         |
|--------------------------|-----|-----------------------|---------|--------------------------|-----|-----------------------|---------|
|                          |     | density ( $10^6$ /mL) |         |                          |     | density ( $10^6$ /mL) |         |
|                          |     | 0.6                   | 1       |                          |     | 0.6                   | 1       |
| density<br>( $10^6$ /mL) | 0.3 | 0.00165               | 0.00232 | density<br>( $10^6$ /mL) | 0.3 | 0.00133               | 0.00114 |
|                          | 1.5 | 0.00030               | 0.00047 |                          | 1.5 | 0.00017               | 0.00015 |
|                          | 2   | 0.00050               | 0.00087 |                          | 2   | 0.00030               | 0.00028 |

**Table B.** P-values for Fig. 1D days 6 and 9

|                          |     | day 6                 |         |                          |     | day 9                 |         |
|--------------------------|-----|-----------------------|---------|--------------------------|-----|-----------------------|---------|
|                          |     | density ( $10^6$ /mL) |         |                          |     | density ( $10^6$ /mL) |         |
|                          |     | 0.6                   | 1       |                          |     | 0.6                   | 1       |
| density<br>( $10^6$ /mL) | 0.3 | 0.00306               | 0.00347 | density<br>( $10^6$ /mL) | 0.3 | 0.00090               | 0.00094 |
|                          | 1.5 | 0.00248               | 0.00256 |                          | 1.5 | 0.00042               | 0.00036 |
|                          | 2   | 0.00208               | 0.00204 |                          | 2   | 0.00045               | 0.00039 |

**Table C.** P-values for Fig. 1E days 6 and 9

|                          |     | day 6                 |         |                          |     | day 9                 |         |
|--------------------------|-----|-----------------------|---------|--------------------------|-----|-----------------------|---------|
|                          |     | density ( $10^6$ /mL) |         |                          |     | density ( $10^6$ /mL) |         |
|                          |     | 0.6                   | 1       |                          |     | 0.6                   | 1       |
| density<br>( $10^6$ /mL) | 0.3 | 0.00216               | 0.00603 | density<br>( $10^6$ /mL) | 0.3 | 0.00092               | 0.00134 |
|                          | 1.5 | 0.00148               | 0.00473 |                          | 1.5 | 0.00028               | 0.00043 |
|                          | 2   | 0.00090               | 0.00365 |                          | 2   | 0.00011               | 0.00018 |

**Table D.** P-values for Fig. 1F days 2, 4, and 6

|                          |     | day 2                 |         | day 4                 |         | day 6                 |         |
|--------------------------|-----|-----------------------|---------|-----------------------|---------|-----------------------|---------|
|                          |     | density ( $10^6$ /mL) |         | density ( $10^6$ /mL) |         | density ( $10^6$ /mL) |         |
|                          |     | 1.5                   | 2       | 1.5                   | 2       | 1.5                   | 2       |
| density<br>( $10^6$ /mL) | 0.3 | 0.04900               | 0.01904 | 0.02786               | 0.00243 | 0.00437               | 0.00213 |
|                          | 0.6 | 0.04515               | 0.02120 | 0.02482               | 0.00234 | 0.00417               | 0.00203 |
|                          | 1   | 0.04719               | 0.02550 | 0.02718               | 0.00247 | 0.00413               | 0.00205 |

**Table E.** P-values for Fig. 2A

|         | 3D-CSC  |         |
|---------|---------|---------|
|         | day 4   | day 6   |
| 2D-RPMI | 0.02595 | 0.01135 |
| 2D-CSC  | 0.02640 | 0.00717 |

**Table F.** P-values for Fig. 2B

|         | 3D-CSC  |         |
|---------|---------|---------|
|         | day 4   | day 6   |
| 2D-RPMI | 0.02334 | 0.00251 |
| 2D-CSC  | 0.02227 | 0.00249 |

**Table G.** P-values for Fig. 2C

|         | 3D-CSC  |         |
|---------|---------|---------|
|         | day 4   | day 6   |
| 2D-RPMI | 0.03493 | 0.00470 |
| 2D-CSC  | 0.03467 | 0.00469 |

**Table H.** P-values for Fig. 2D

|         | 3D-CSC  |         |
|---------|---------|---------|
|         | day 4   | day 6   |
| 2D-RPMI | 0.04560 | 0.01334 |
| 2D-CSC  | 0.04116 | 0.01352 |

**Table I.** P-values for Fig. 5B

|        | Modulus (kPa) |         |         |         |         |
|--------|---------------|---------|---------|---------|---------|
|        | 2             | 5       | 25      | 50      | 70      |
| MCF7   | 0.00638       | —       | 0.00405 | 0.00341 | 0.00372 |
| MDA    | 0.00035       | —       | 0.00007 | 0.00024 | 0.00059 |
| HCT116 | 0.00310       | 0.00325 | —       | 0.00294 | 0.00401 |
| U2OS   | 0.00678       | 0.00592 | 0.00412 | —       | 0.01015 |
| AGS    | 0.02295       | 0.02131 | —       | 0.02586 | 0.02100 |

**Table J.** P-values for Fig. 5C

|        | Modulus (kPa) |         |         |         |         |
|--------|---------------|---------|---------|---------|---------|
|        | 2             | 5       | 25      | 50      | 70      |
| MCF7   | 0.00518       | —       | 0.00498 | 0.00585 | 0.00585 |
| MDA    | 0.00030       | —       | 0.00025 | 0.00127 | 0.00127 |
| HCT116 | 0.00013       | 0.00843 | —       | 0.00072 | 0.00013 |
| U2OS   | 0.00556       | 0.00556 | 0.03642 | —       | 0.00556 |
| AGS    | 0.00241       | 0.00241 | —       | 0.02529 | 0.00241 |

**Table K.** P-values for Fig. 5D

|        | Modulus (kPa) |         |         |         |         |
|--------|---------------|---------|---------|---------|---------|
|        | 2             | 5       | 25      | 50      | 70      |
| MCF7   | 0.00229       | —       | 0.00214 | 0.00184 | 0.00300 |
| MDA    | 0.00054       | —       | 0.00024 | 0.00055 | 0.00131 |
| HCT116 | 0.00490       | 0.00528 | —       | 0.00250 | 0.00434 |
| U2OS   | 0.00693       | 0.00650 | 0.00423 | —       | 0.01012 |
| AGS    | 0.01744       | 0.02445 | —       | 0.04837 | 0.02172 |

**Table L.** P-values for Fig. 5F for MCF7-CD44

|       | Modulus (kPa) |   |         |         |         |
|-------|---------------|---|---------|---------|---------|
|       | 2             | 5 | 25      | 50      | 70      |
| day 6 | 0.04331       | – | 0.01432 | 0.00852 | 0.00701 |
| day 9 | 0.00893       | – | 0.00629 | 0.00251 | 0.00076 |

**Table M.** P-values for Fig. 5F for MCF7-ABCG2

|       | Modulus (kPa) |   |         |         |         |
|-------|---------------|---|---------|---------|---------|
|       | 2             | 5 | 25      | 50      | 70      |
| day 6 | 0.01157       | – | 0.00815 | 0.00726 | 0.00653 |
| day 9 | 0.00146       | – | 0.00113 | 0.00052 | 0.00031 |

**Table N.** P-values for Fig. 5F for MDA231-CD44

|       | Modulus (kPa) |   |         |         |         |
|-------|---------------|---|---------|---------|---------|
|       | 2             | 5 | 25      | 50      | 70      |
| day 6 | 0.00974       | – | 0.00831 | 0.00094 | 0.00074 |
| day 9 | 0.00686       | – | 0.00457 | 0.00082 | 0.00044 |

**Table O.** P-values for Fig. 5F for MDA231-EGFR

|       | Modulus (kPa) |   |         |         |         |
|-------|---------------|---|---------|---------|---------|
|       | 2             | 5 | 25      | 50      | 70      |
| day 6 | 0.01350       | – | 0.00863 | 0.00192 | 0.00045 |
| day 9 | 0.00691       | – | 0.00243 | 0.00083 | 0.00015 |

**Table P.** P-values for Fig. 5F for HCT116-CD44

|       | Modulus (kPa) |         |    |         |         |
|-------|---------------|---------|----|---------|---------|
|       | 2             | 5       | 25 | 50      | 70      |
| day 6 | 0.00447       | 0.03851 | –  | 0.01159 | 0.00755 |
| day 9 | 0.00084       | 0.00453 | –  | 0.00119 | 0.00024 |

**Table Q.** P-values for Fig. 5F for HCT116-TGF $\beta$ 

|       | Modulus (kPa) |         |    |         |         |
|-------|---------------|---------|----|---------|---------|
|       | 2             | 5       | 25 | 50      | 70      |
| day 6 | 0.00321       | 0.00412 | –  | 0.00052 | 0.00015 |
| day 9 | 0.00086       | 0.00732 | –  | 0.00063 | 0.00008 |

**Table R.** P-values for Fig. 5F for U2OS-CD44

|       | Modulus (kPa) |         |         |    |         |
|-------|---------------|---------|---------|----|---------|
|       | 2             | 5       | 25      | 50 | 70      |
| day 6 | 0.00521       | 0.00742 | 0.02419 | –  | 0.03507 |
| day 9 | 0.00085       | 0.00157 | 0.00491 | –  | 0.00531 |

**Table S.** P-values for Fig. 5F for U2OS-CD133

|       | Modulus (kPa) |         |         |    |         |
|-------|---------------|---------|---------|----|---------|
|       | 2             | 5       | 25      | 50 | 70      |
| day 6 | 0.00731       | 0.00682 | 0.01473 | –  | 0.01731 |
| day 9 | 0.00031       | 0.00068 | 0.00153 | –  | 0.00412 |

**Table T.** P-values for Fig. 5F for AGS-CD44

|       | Modulus (kPa) |         |    |         |         |
|-------|---------------|---------|----|---------|---------|
|       | 2             | 5       | 25 | 50      | 70      |
| day 6 | 0.00415       | 0.00962 | –  | 0.04279 | 0.00678 |
| day 9 | 0.00096       | 0.00269 | –  | 0.00478 | 0.00104 |

**Table U.** P-values for Fig. 5F for AGS-OCT4

|       | AGS-OCT4<br>Modulus (kPa) |         |    |         |         |
|-------|---------------------------|---------|----|---------|---------|
|       | 2                         | 5       | 25 | 50      | 70      |
| day 6 | 0.00063                   | 0.00092 | –  | 0.00249 | 0.00075 |
| day 9 | 0.00014                   | 0.00074 | –  | 0.00313 | 0.00006 |
