# Supplementary material for: RETRACTED: Optimum 3D Matrix Stiffness for Maintenance of Cancer Stem Cells Is Dependent on Tissue Origin of Cancer Cells
Source: PubMed Central journal article supplement (PMC4500566; doi:10.1371/journal.pone.0132377), 2015-07-13
Supplement: pone.0132377.s002.pdf [file pone.0132377.s002.pdf]

S2. Tables of p-values for statistically significant differences for the data with an asterisk in Fig. 6 and 7

**Table A.** P-values for Fig. 6G

|          | CD44 bp |         |         |
|----------|---------|---------|---------|
|          | MDA     | HCT116  | U2OS    |
| Control  | 0.00013 | 0.00034 | 0.00110 |
| mCD44 bp | 0.00005 | 0.00157 | 0.00058 |

**Table B.** P-values for Fig. 6H

|          | CD44 bp |         |         |
|----------|---------|---------|---------|
|          | MDA     | HCT116  | U2OS    |
| Control  | 0.00011 | 0.00014 | 0.00170 |
| mCD44 bp | 0.00001 | 0.00016 | 0.00113 |

**Table C.** P-values for Fig. 6I

|          | CD44 bp |         |         |
|----------|---------|---------|---------|
|          | MDA     | HCT116  | U2OS    |
| Control  | 0.00100 | 0.00295 | 0.00801 |
| mCD44 bp | 0.00136 | 0.00278 | 0.00987 |

**Table D.** P-values for Fig. 6J

|          | CD44 bp |         |
|----------|---------|---------|
|          | CD44    | EGFR    |
| Ctrl     | 0.00114 | 0.00356 |
| mCD44 bp | 0.00061 | 0.00332 |

**Table E.** P-values for Fig. 6K

|          | CD44 bp |             |
|----------|---------|-------------|
|          | CD44    | TGF $\beta$ |
| Ctrl     | 0.00179 | 0.00374     |
| mCD44 bp | 0.00170 | 0.00221     |

**Table F.** P-values for Fig. 6L

|          | CD44 bp |         |
|----------|---------|---------|
|          | CD44    | CD133   |
| Ctrl     | 0.00155 | 0.00153 |
| mCD44 bp | 0.00106 | 0.00130 |

**Table G.** P-values for Fig. 7A

|       | day 2   | day 4   | day 6   | day 9   |
|-------|---------|---------|---------|---------|
| day 3 | 0.03905 | 0.04629 | 0.00536 | 0.00074 |

**Table H.** P-values for Fig. 7B

|       | day 2   | day 3   | day 6   | day 9   |
|-------|---------|---------|---------|---------|
| day 4 | 0.00018 | 0.03776 | 0.00090 | 0.00056 |

**Table I.** P-values for Fig. 7D

|       | day 2   | day 3   | day 6   | day 9   |
|-------|---------|---------|---------|---------|
| day 4 | 0.00004 | 0.00003 | 0.00831 | 0.00023 |

**Table J.** P-values for Fig. 7E

|       | day 2   | day 3 | day 4 | day 6   | day 9   |
|-------|---------|-------|-------|---------|---------|
| day 3 | 0.00053 | –     | –     | 0.00052 | 0.00059 |
| day 4 | 0.00027 | –     | –     | 0.00035 | 0.00022 |

**Table K.** P-values for Fig. 7F

|       | day 2   | day 3   | day 6   | day 9   |
|-------|---------|---------|---------|---------|
| day 4 | 0.00110 | 0.00076 | 0.00225 | 0.00122 |

**Table L.** P-values for Fig. 7G

|       | day 2   | day 3   | day 6   | day 9   |
|-------|---------|---------|---------|---------|
| day 4 | 0.00116 | 0.00039 | 0.01801 | 0.00121 |

**Table M.** P-values for Fig. 7H

|       | day 2   | day 3   | day 6   | day 9   |
|-------|---------|---------|---------|---------|
| day 4 | 0.00116 | 0.00063 | 0.00094 | 0.00066 |

**Table N.** P-values for Fig. 7I

|       |         |         |
|-------|---------|---------|
|       | 2 kPa   | 25 kPa  |
| 5 kPa | 0.03858 | 0.00123 |

**Figure O.** P-values for Fig. 7K

|       |         |         |
|-------|---------|---------|
|       | 2 kPa   | 25 kPa  |
| 5 kPa | 0.00803 | 0.00440 |
